# Supplementary material
Source: PubMed Central journal article supplement (PMC4445235)

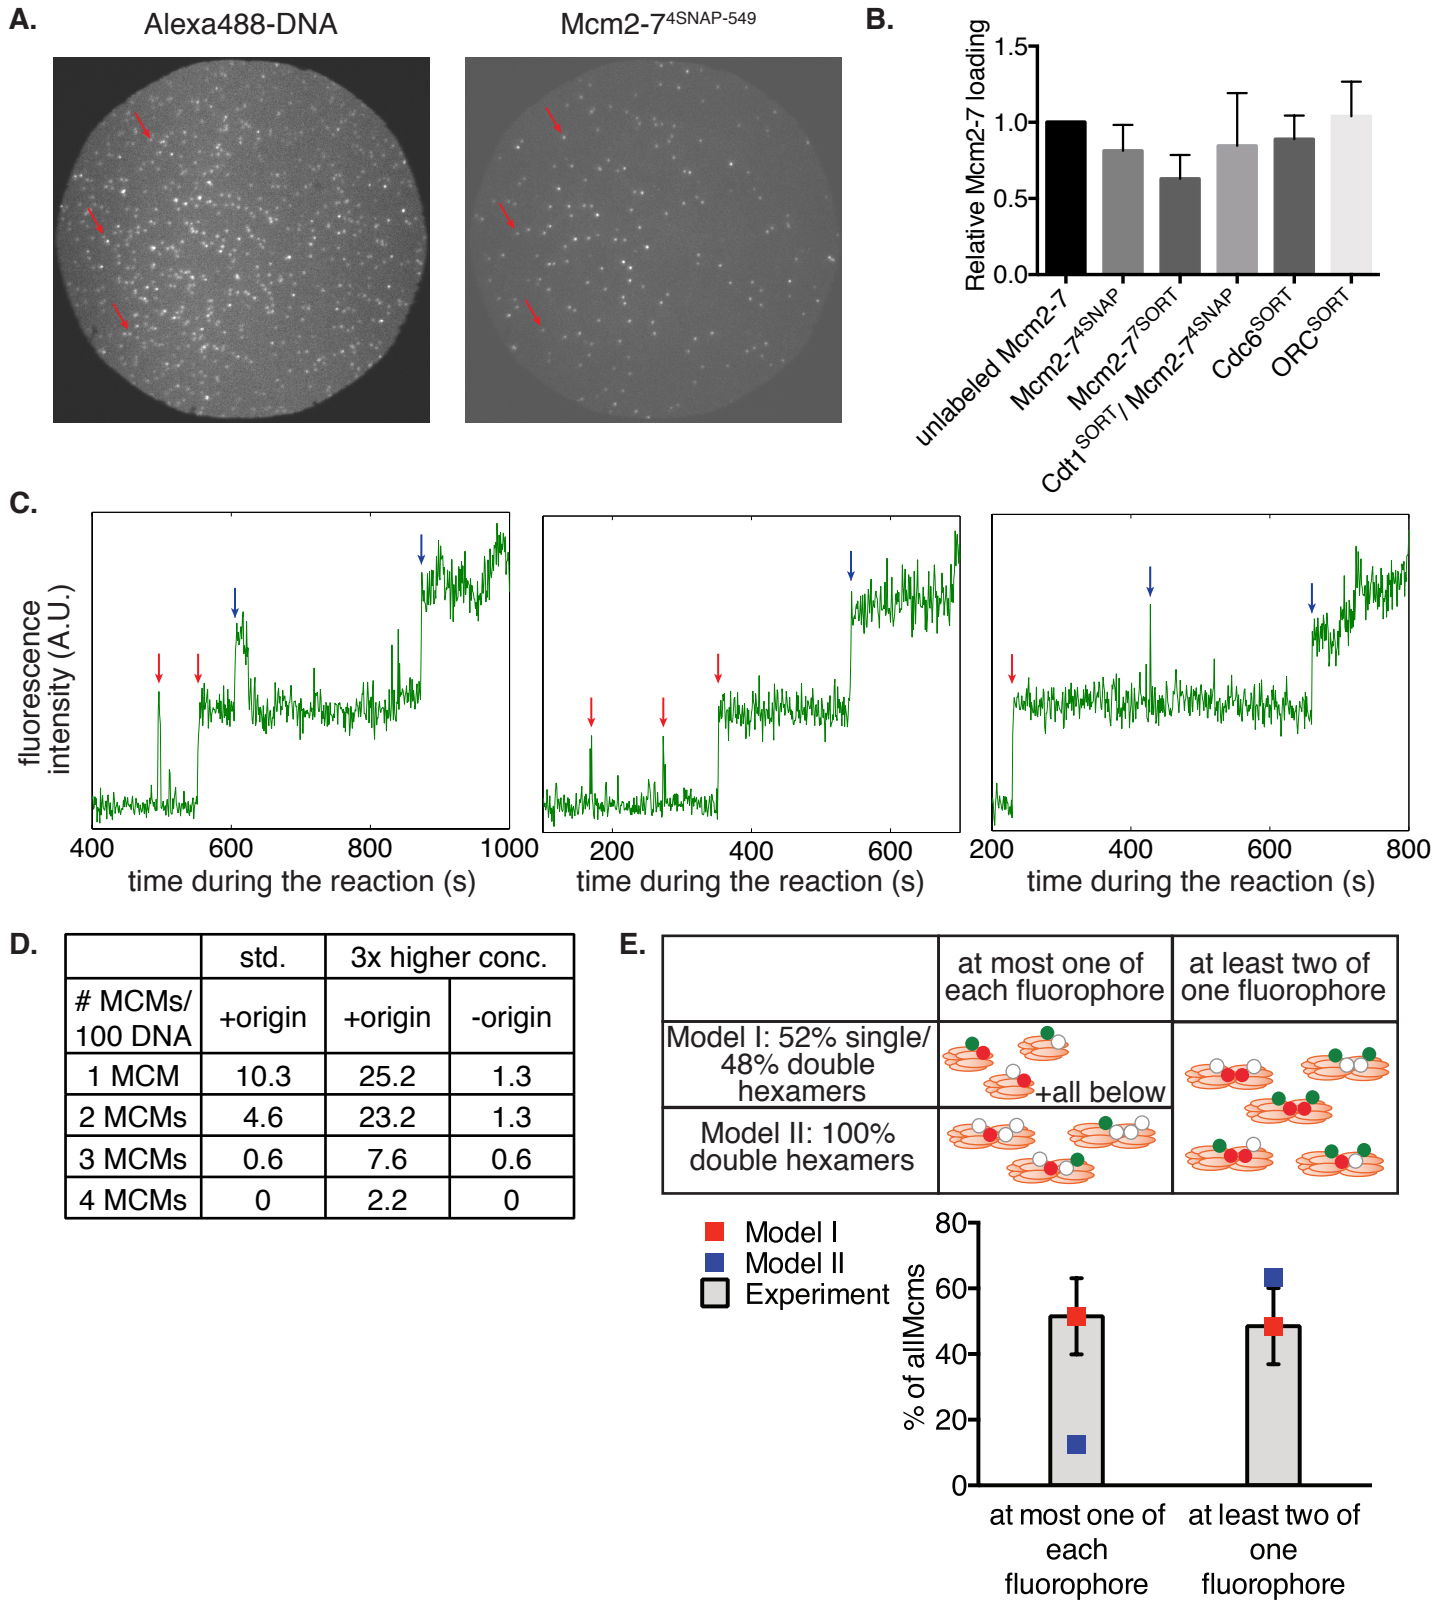

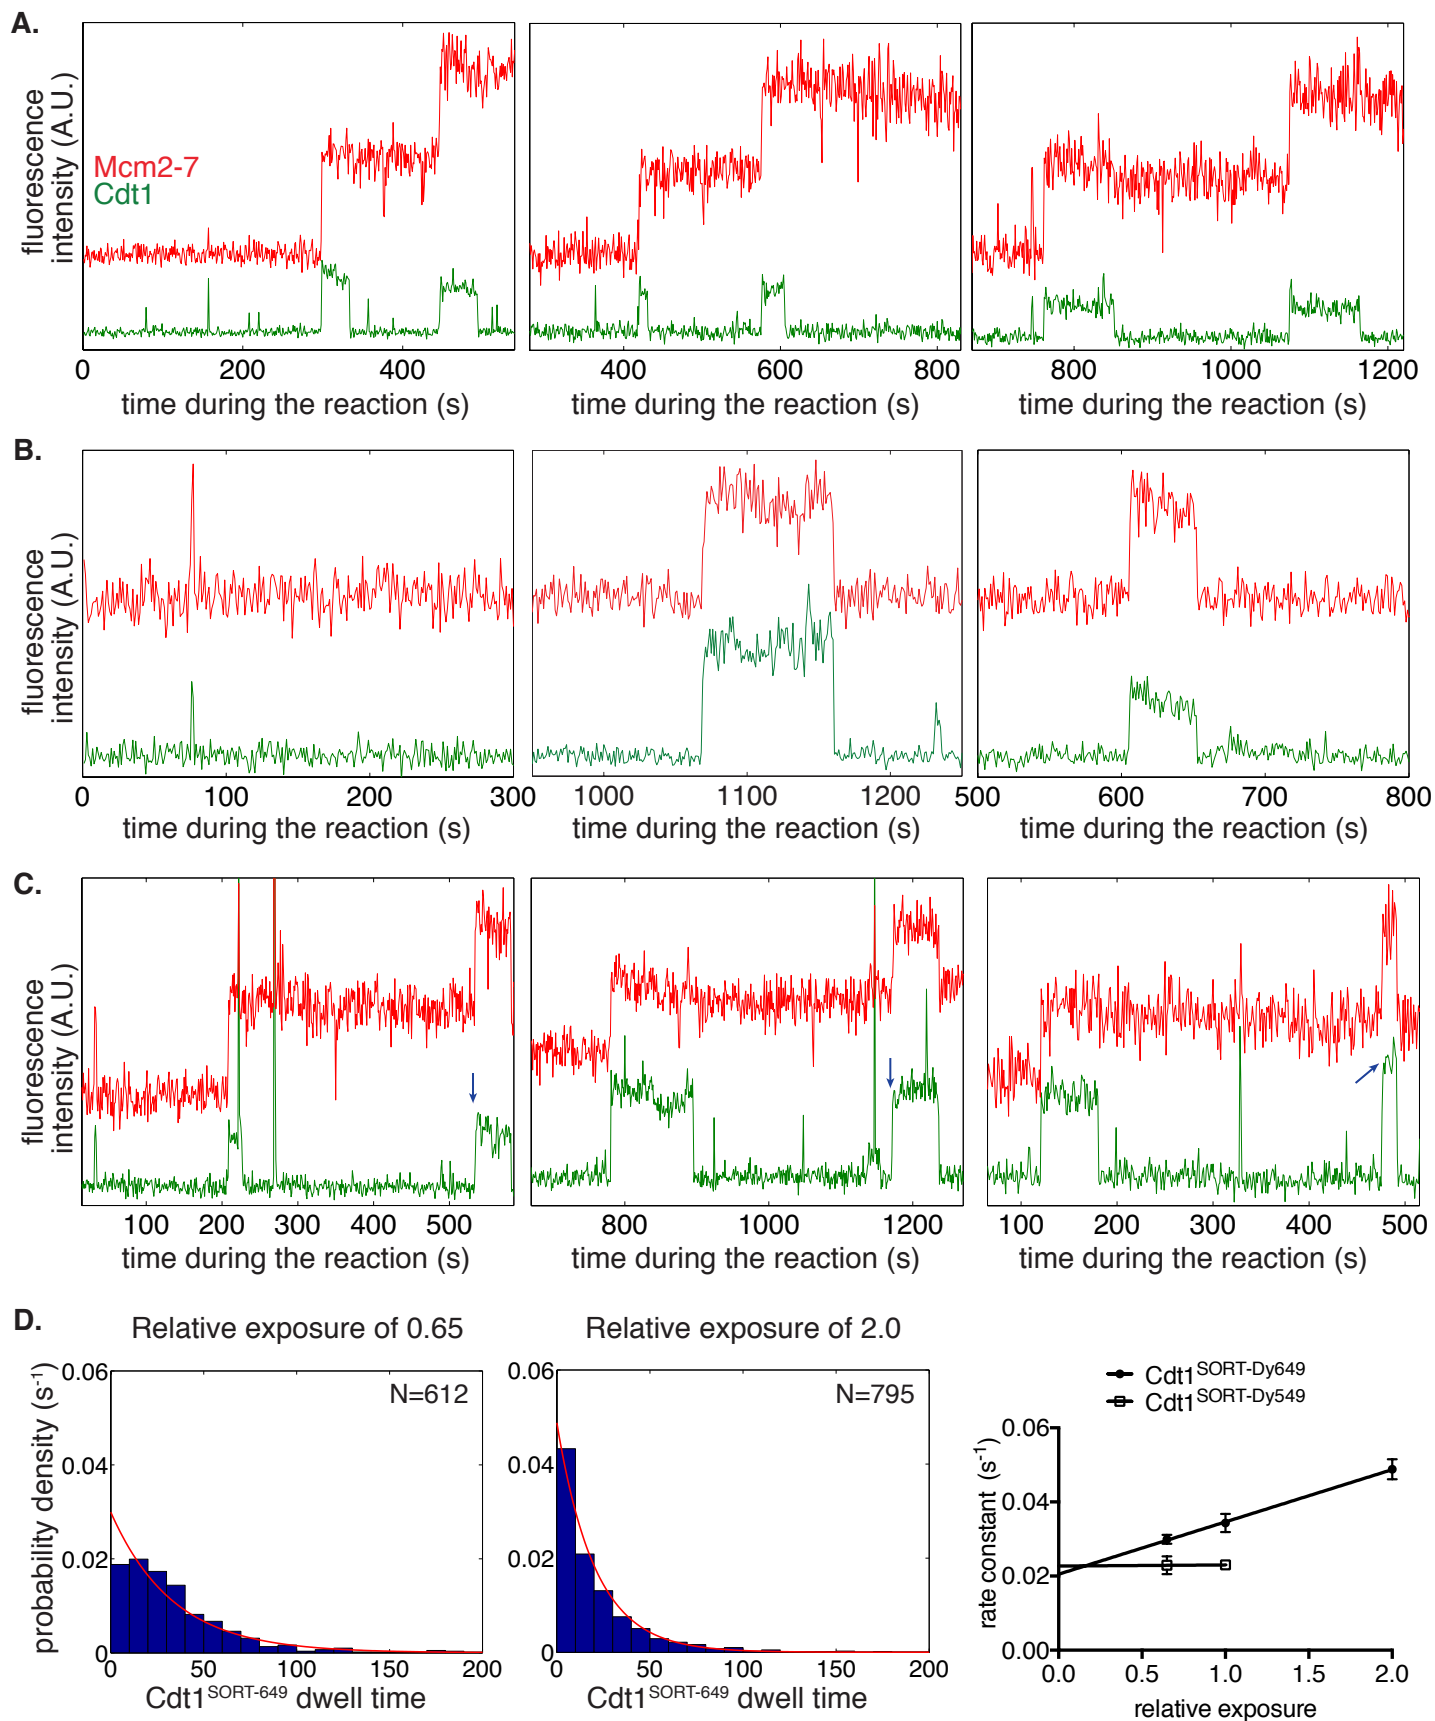

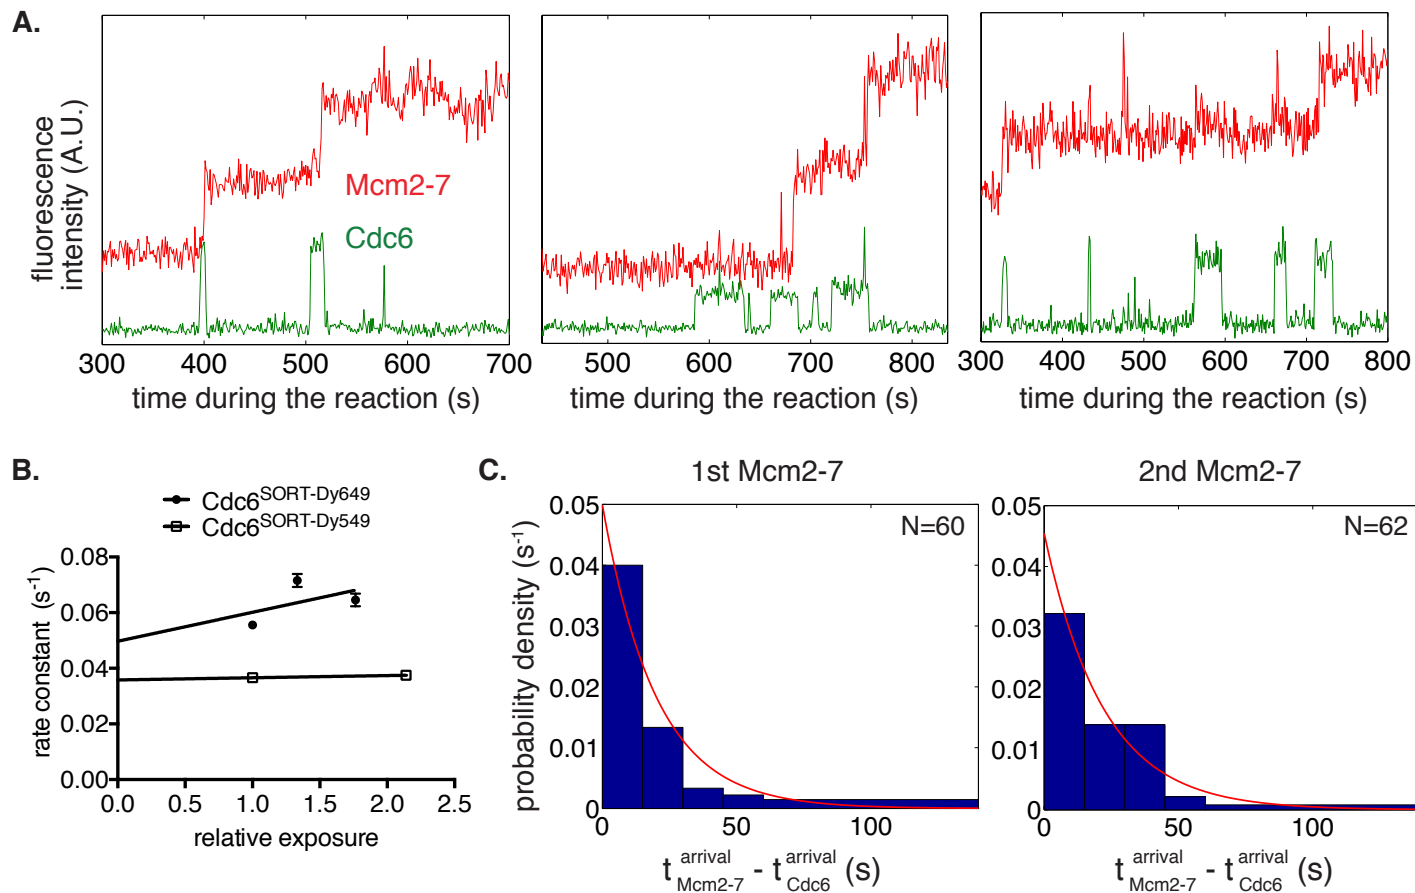

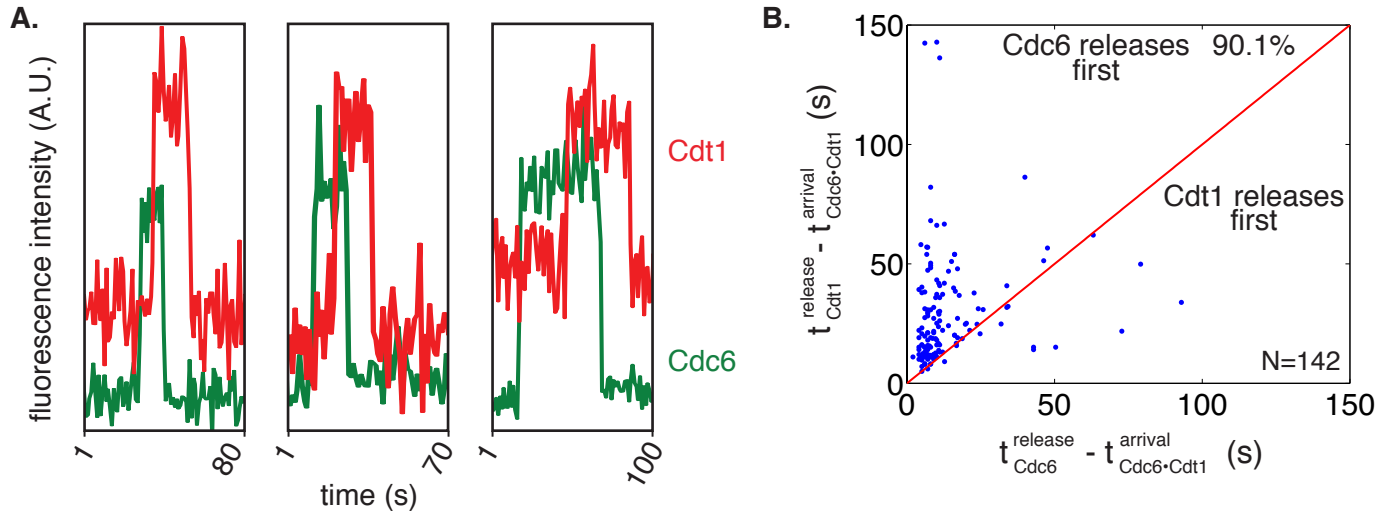

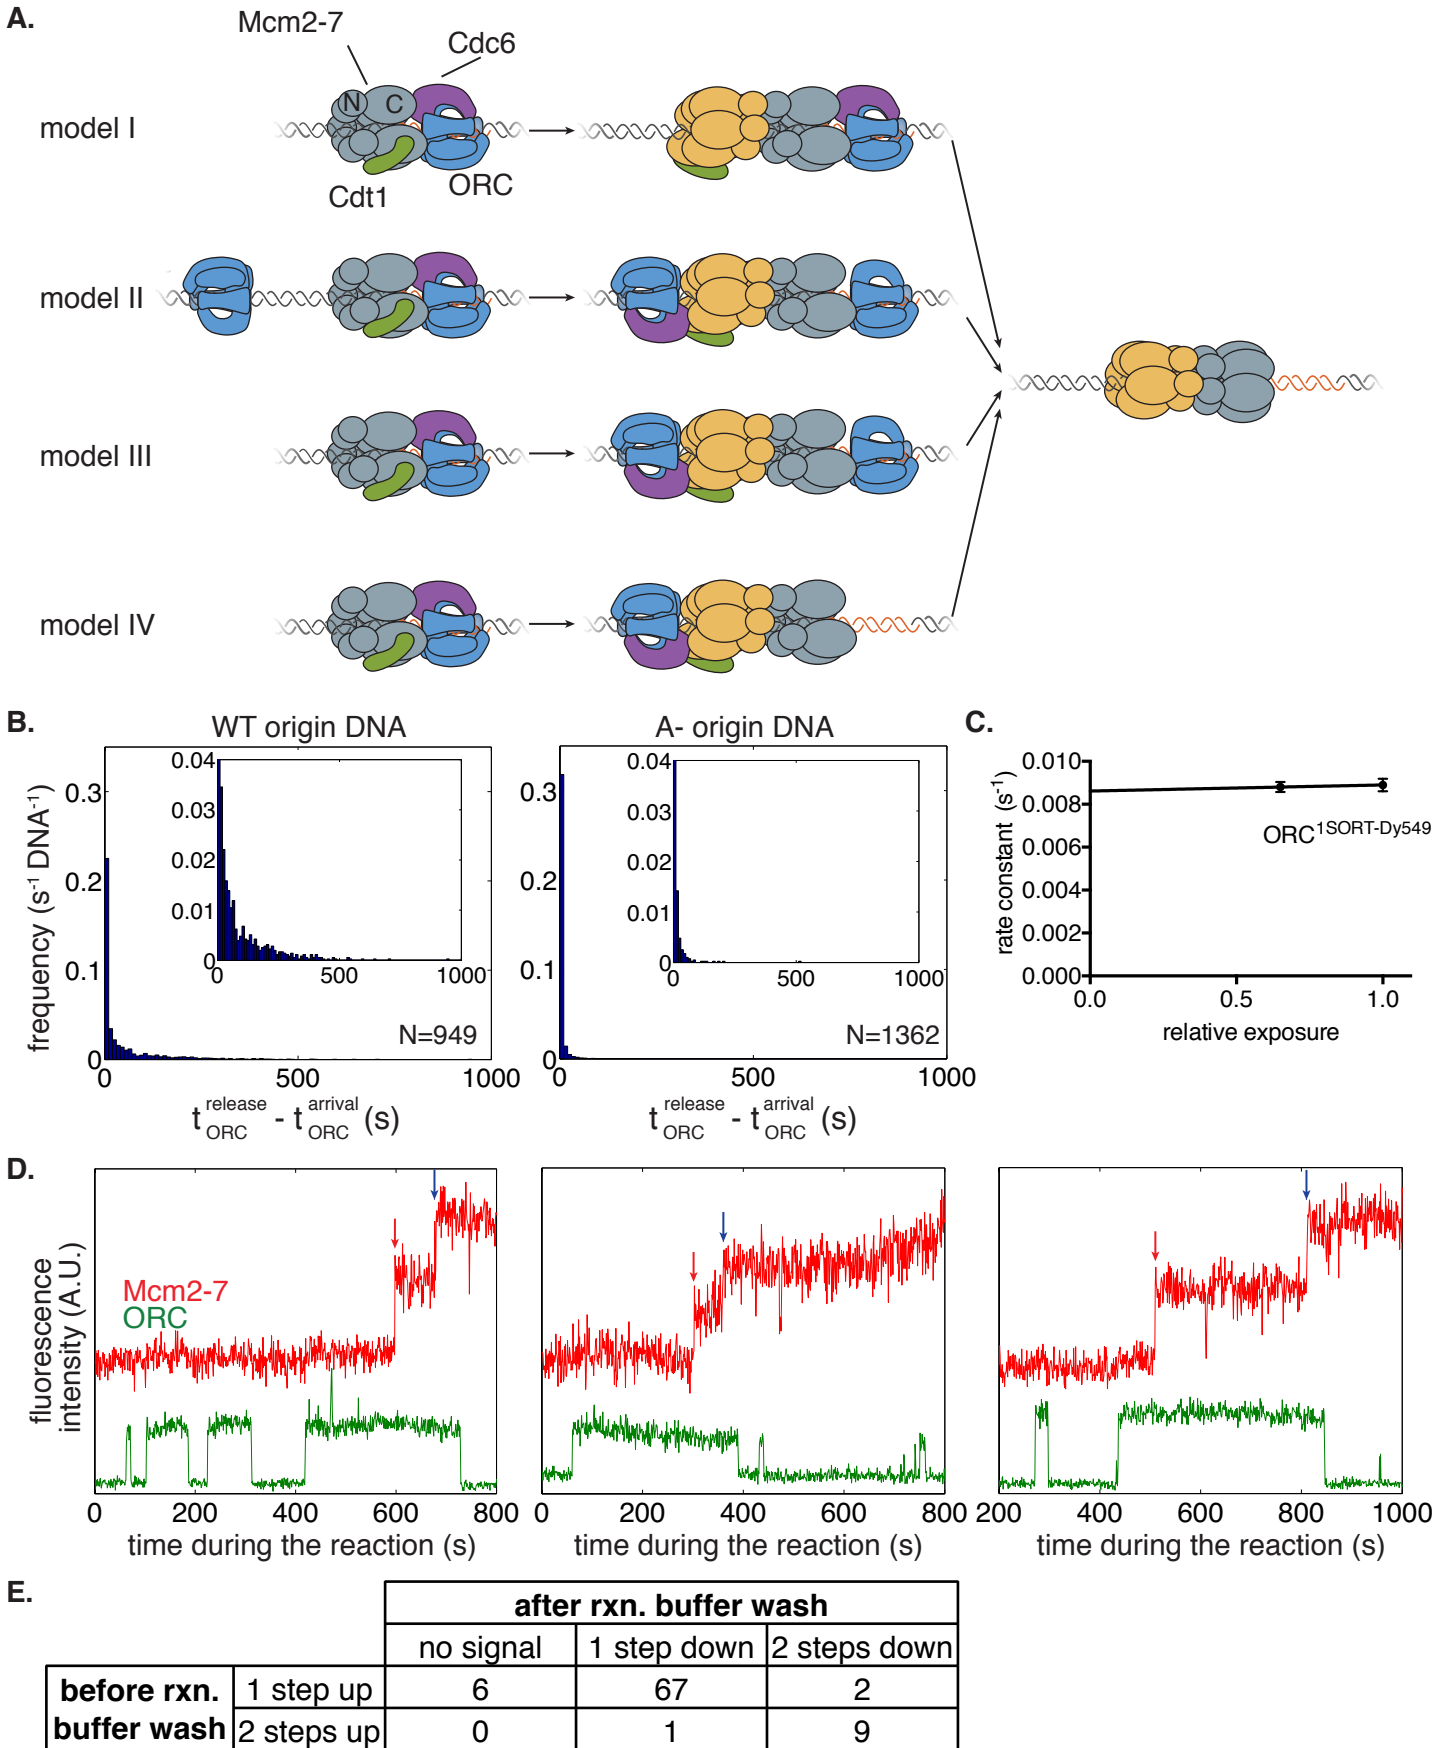

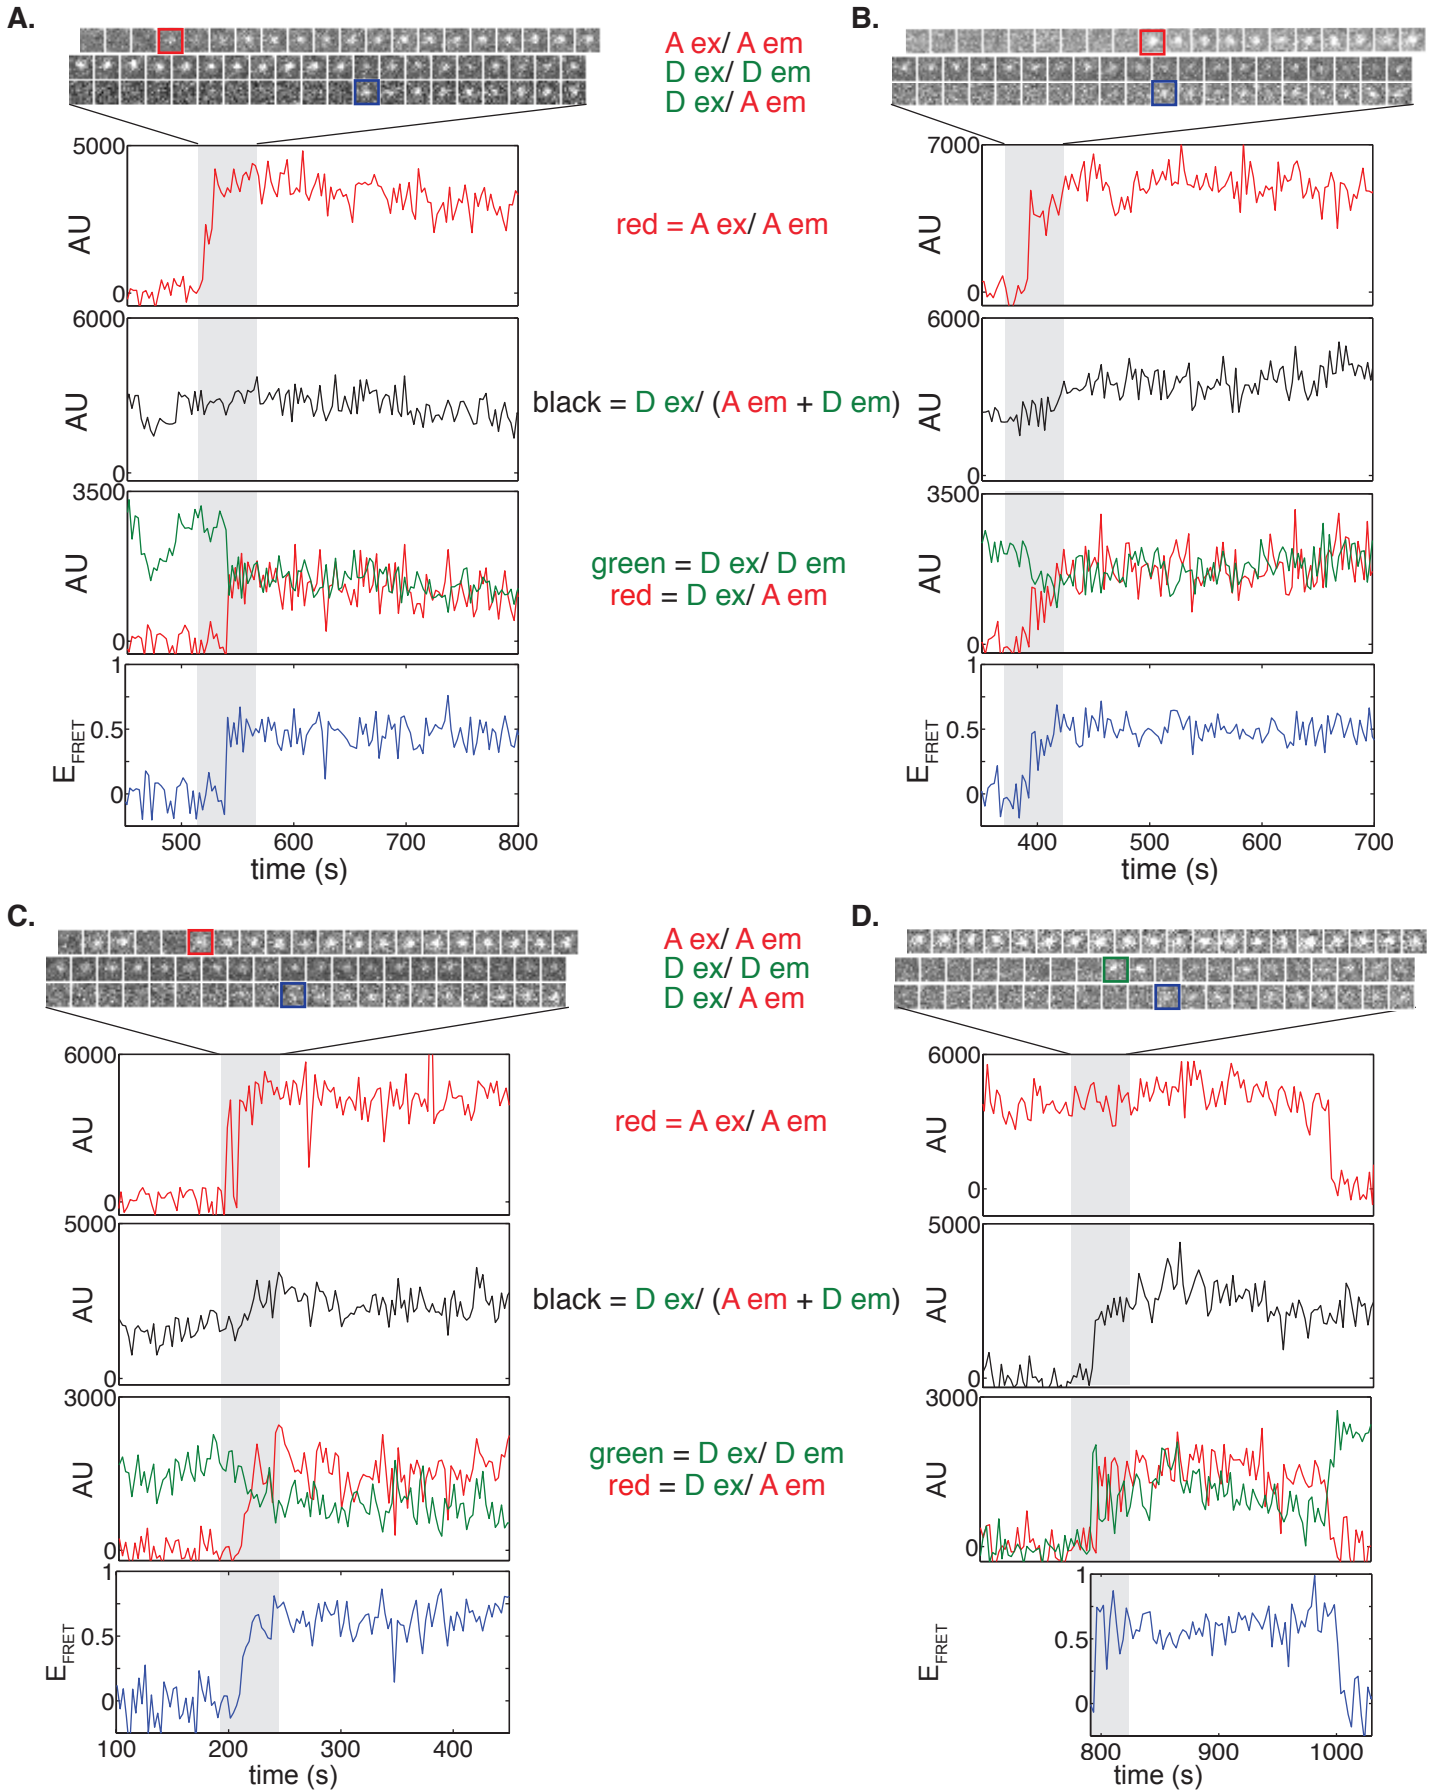

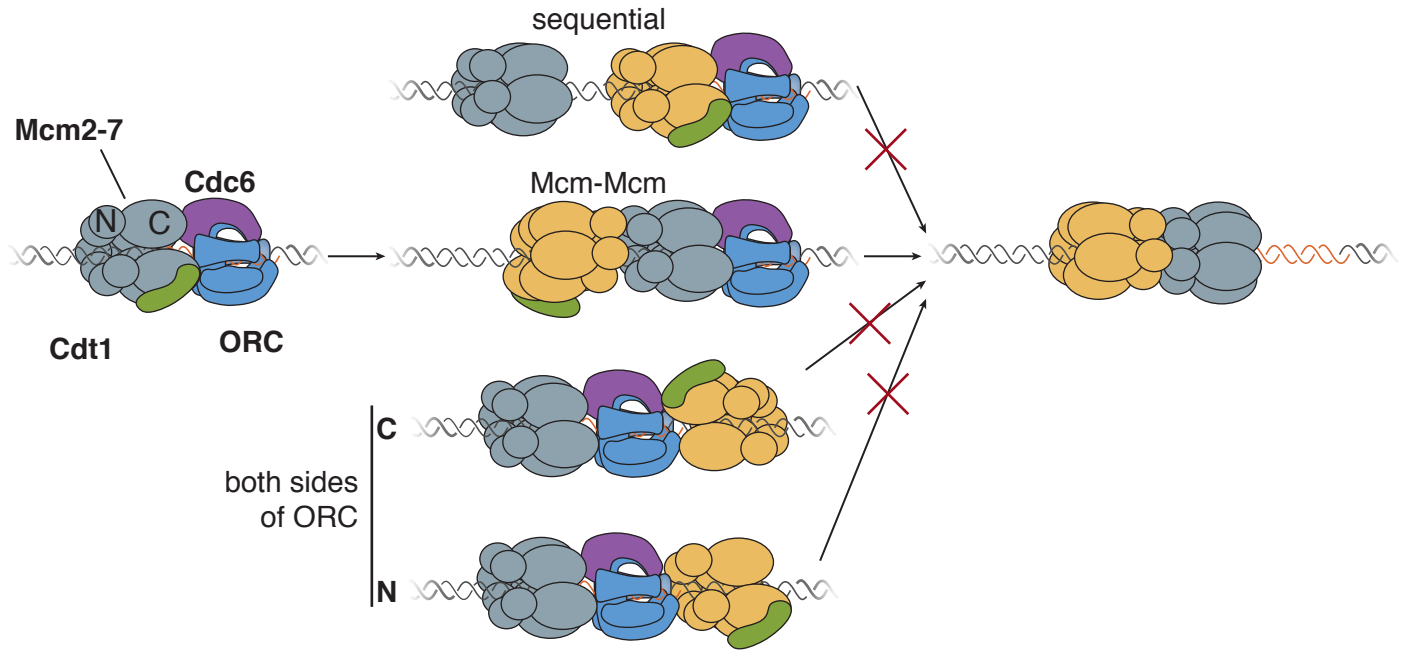

Supplement: NIHMS691803-supplement-Supp__Figures.pdf [file NIHMS691803-supplement-Supp__Figures.pdf]
